1                    **Introgression in *Brownea* suggests that reticulate evolution**  
2                    **contributes to Amazonian tree diversity**

3                    Rowan J. Schley<sup>1,2\*</sup>, R. Toby Pennington<sup>3,4</sup>, Oscar Alejandro Pérez-Escobar<sup>1</sup>, Andrew J. Helmstetter<sup>5</sup>,  
4                    Manuel de la Estrella<sup>6</sup>, Isabel Larridon<sup>1,7</sup>, Izai Alberto Bruno Sabino Kikuchi<sup>1,8</sup>,  
5                    Timothy Barraclough<sup>2</sup>, Félix Forest<sup>1</sup>, and Bente Klitgård<sup>1</sup>

6  
7                    <sup>1</sup>*Royal Botanic Gardens, Kew, Richmond, Surrey, TW9 3AE, UK*

8                    <sup>2</sup>*Department of Life Sciences, Imperial College London, Silwood Park, Ascot, Berkshire, UK, SL5 7PY*

9                    <sup>3</sup>*Geography, University of Exeter, Laver Building, North Park Road, Exeter EX4 4QE*

10                    <sup>4</sup>*Royal Botanic Garden Edinburgh, 20a Inverleith Row, Edinburgh EH3 5LR*

11                    <sup>5</sup>*Institut de Recherche pour le Développement (IRD), UMR-DIADE, BP 64501, F-34394 Montpellier cedex 5, France.*

12                    <sup>6</sup>*Departamento de Botánica, Ecología y Fisiología Vegetal, Facultad de Ciencias, Campus de Rabanales, Universidad de Córdoba,*  
13                    *14071, Córdoba, Spain*

14                    <sup>7</sup>*Systematic and Evolutionary Botany Lab, Department of Biology, Ghent University, K.L. Ledeganckstraat 35, 9000 Gent, Belgium*

15                    <sup>8</sup>*Universiteit Leiden, Hortus botanicus Leiden, PO Box 9500, Leiden, 2300 RA, The Netherlands*

16  
17  
18                    \*Corresponding author at: Room E.2.6, Herbarium, Royal Botanic Gardens, Kew, Richmond, Surrey, TW9 3AE, UK

19                    E-mail address: [r.schley@kew.org](mailto:r.schley@kew.org) (R. J. Schley).

20  
21                    **Abstract**

22                    Hybridization has the potential to generate or homogenize biodiversity and is a particularly common  
23                    phenomenon in plants, with an estimated 25% of species undergoing inter-specific gene flow.

24                    However, hybridization has rarely been demonstrated among tree species in Amazonia, the world's  
25                    largest rainforest. We show that within *Brownea*, a characteristic tree genus of Amazonia, there is  
26                    extensive evidence of hybridization. Using both phylogenomic and population genomic approaches  
27                    we find multiple historical hybridization events within *Brownea*, along with contemporary  
28                    hybridization among co-occurring species. Finally, we infer homogeneous rates of gene flow among  
29                    different genomic loci, indicating a lack of selection against hybrids, reflecting their persistence over  
30                    time. These results demonstrate that gene flow between Amazonian tree species has occurred across  
31                    temporal scales and may have contributed to the evolution of the most diverse tree flora on Earth.

32

33 Introduction

34 Reproductive isolation is often seen as a prerequisite for speciation and as a defining feature of  
35 species<sup>1,2</sup>. Despite this, hybridization between species is known to occur, and has several different  
36 outcomes, from the erosion of evolutionary divergence<sup>3,4</sup> to the formation of entirely new ‘hybrid  
37 species’<sup>5</sup>. Neotropical rainforests harbour the highest levels of plant diversity on Earth<sup>6</sup>, and to date  
38 there has been little convincing evidence that hybridization consistently occurs between tree species  
39 therein. Indeed, the prevailing view has been that hybridization between tropical tree species is an  
40 exceptionally rare event<sup>7-9</sup>. Although a few observations of reproductive biology support this, such as  
41 the intersterility between lineages of *Inga*, a species-rich genus in the legume family<sup>10</sup>, evidence for  
42 hybridization has been poorly tested empirically in tropical floras. The only potential example of  
43 hybridization among neotropical trees which has been documented using DNA sequence data  
44 involves two species of *Carapa*<sup>11</sup> found in Amazonia, the largest expanse of rainforest in the world  
45 which contains at least 6,800 tree species<sup>12</sup>.

46 One factor that suggests hybridization might occur more frequently in neotropical rainforest tree  
47 species, if their reproductive isolation is not absolute, is the remarkable level of sympatry found for  
48 closely related species. In several neotropical lineages, including *Inga*, *Guatteria* and *Swartzia*, many  
49 recently diverged species co-occur<sup>13</sup>, often to a remarkable degree. One such example of this is the  
50 co-occurrence of 19 *Inga* species in a single hectare of the Ecuadorian Amazon<sup>14</sup>. As such, for many  
51 rainforest taxa the opportunity for hybridization is constantly present.

52 Hybridization can have a range of evolutionary consequences. In many cases, hybridization simply  
53 results in the formation of sterile, maladapted offspring with poor reproductive fitness, allowing  
54 genetic isolation between species to be maintained (i.e., reinforcement<sup>15</sup>). In other cases, there may be  
55 a permanent movement of genetic material from one lineage to another<sup>16</sup>, which is known as  
56 ‘introgression’. This transfer of genetic material through hybridization may confer a selective  
57 advantage to resultant offspring<sup>17</sup>, in which case it is referred to as ‘adaptive introgression’. Adaptive

58 introgression is most often observed between closely-related taxa during the invasion of new habitats  
59 <sup>18, 19</sup>. Furthermore, hybridization can lead to rapid evolutionary radiations. This occurs through the re-  
60 assembly of standing genetic variation which has accumulated between diverging lineages, and which  
61 has already been subject to selection. This ‘combinatorial’ process is much more rapid than the  
62 gradual accumulation of variation through mutation, and the passage of these variants through  
63 hybridization often fuels rapid diversification events <sup>20</sup>. This has been demonstrated in a wide range of  
64 taxa, including sunflowers, African cichlid fish and Darwin’s finches <sup>21-23</sup>.

65 Introgression can occur at different rates in different regions of the genome <sup>24</sup>. Regions under  
66 divergent selection may remain distinct due to reduced fitness of hybrid genotypes at such loci,  
67 resulting in a low rate of introgression. Conversely, regions under little or no selection tend to  
68 introgress more freely, becoming homogenised between species. Moreover, if there is selection for  
69 hybrid genotypes (as in adaptive introgression), the rate of introgression for a region may be further  
70 increased relative to the rest of the genome <sup>25</sup>. Such a process has been demonstrated in temperate-  
71 zone tree species, where divergence between hybridizing lineages is maintained through  
72 environmentally-driven selection <sup>26, 27</sup>. This explains why species that hybridize can remain as  
73 biologically distinct (and taxonomically identifiable) groups despite undergoing genetic exchange  
74 with other species <sup>28, 29</sup>.

75 *Brownea*, a member of the pea and bean family (Fabaceae/Leguminosae), is a characteristic tree  
76 genus of lowland neotropical rainforests, and contains around 27 species distributed across northern  
77 South America. Previous work indicates that there is a broad degree of phylogenetic incongruence  
78 evident in this genus <sup>30</sup> which might indicate hybridization, although this could also result from  
79 incomplete lineage sorting (the differential inheritance of genetic variation from a common ancestral  
80 species in different descendent lineages). However, there are numerous *Brownea* hybrids in  
81 cultivation (e.g. *B. x crawfordii* <sup>31</sup> and *B. hybrida* <sup>32</sup>), as well as several instances of putative  
82 hybridization among *Brownea* lineages in the wild. The most notable of these instances is that  
83 proposed between the range-restricted *Brownea jaramilloi* <sup>33</sup> and the wide-ranging *B. grandiceps*,  
84 which co-occur in the Ecuadorian Amazon (Fig. 1). There are multiple morphological distinctions

85 between these two species, including differences in inflorescence colour and structure, growth habit,  
86 tree height and leaf morphology<sup>33</sup>. Although they co-occur, these species favour different habitats: *B.*  
87 *jaramilloi* grows on ridge tops and hillsides, whereas *B. grandiceps* shows a slight preference for  
88 swamps and valleys but is more evenly distributed<sup>33,34</sup>. Despite this, hybridization appears to occur,  
89 as evidenced by the existence of a putative hybrid between these two species known as *B. "rosada"*  
90 (Fig. 1). *Brownea "rosada"* displays an intermediate morphology between its two parental species,  
91 producing pink flowers. The hypothesis of a *B. jaramilloi* x *B. grandiceps* hybrid has not yet been  
92 tested, however, using molecular data.

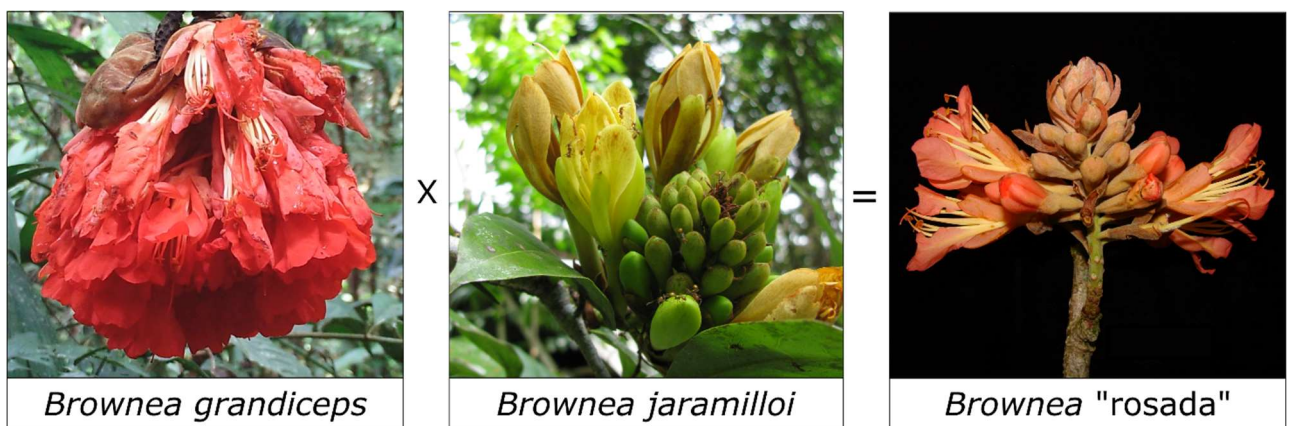

95 As a member of the legume family, which dominates Amazonian forests<sup>35</sup>, and with its apparent  
96 propensity for hybridization, *Brownea* is an excellent system with which to study the phylogenetic  
97 patterns and genomic architecture of introgression in neotropical rainforest trees. Systematically  
98 documenting hybridization at a range of time scales and taxonomic levels within this group could  
99 reveal how admixture has contributed to the assembly of one of the world's richest floras.

100 Accordingly, this investigation aims to answer the following questions:

101

- 102 1. Is there evidence of hybridization at a deep phylogenetic level in this lineage of neotropical  
103 rainforest tree?

104 2. Is there evidence of more recent gene flow, and if so, does this occur evenly across most of  
105 the genome?

106

## 107 Results

### 108 Phylogenetic analysis

109 Using DNA sequence data from 226 nuclear gene regions, we produced a ‘species’ tree using  
110 *ASTRAL*<sup>36</sup> (Fig. 2) based on gene trees inferred with the program *RAxML*<sup>37</sup>. This resulted in well-  
111 supported relationships between major subclades (>0.9 local posterior probability (PP)), with lower  
112 support for inter-specific relationships. *ASTRAL* inferred that 50.2% of gene tree quartets were  
113 congruent with the ‘species’ tree. There was a high degree of discordance among gene tree topologies  
114 at many nodes, with multiple alternative bipartitions reconstructed at most nodes. This is evident from  
115 the presence of many more conflicting gene trees (numbers below branches) than congruent gene  
116 trees (numbers above branches) in Supplementary Fig. 1.

117

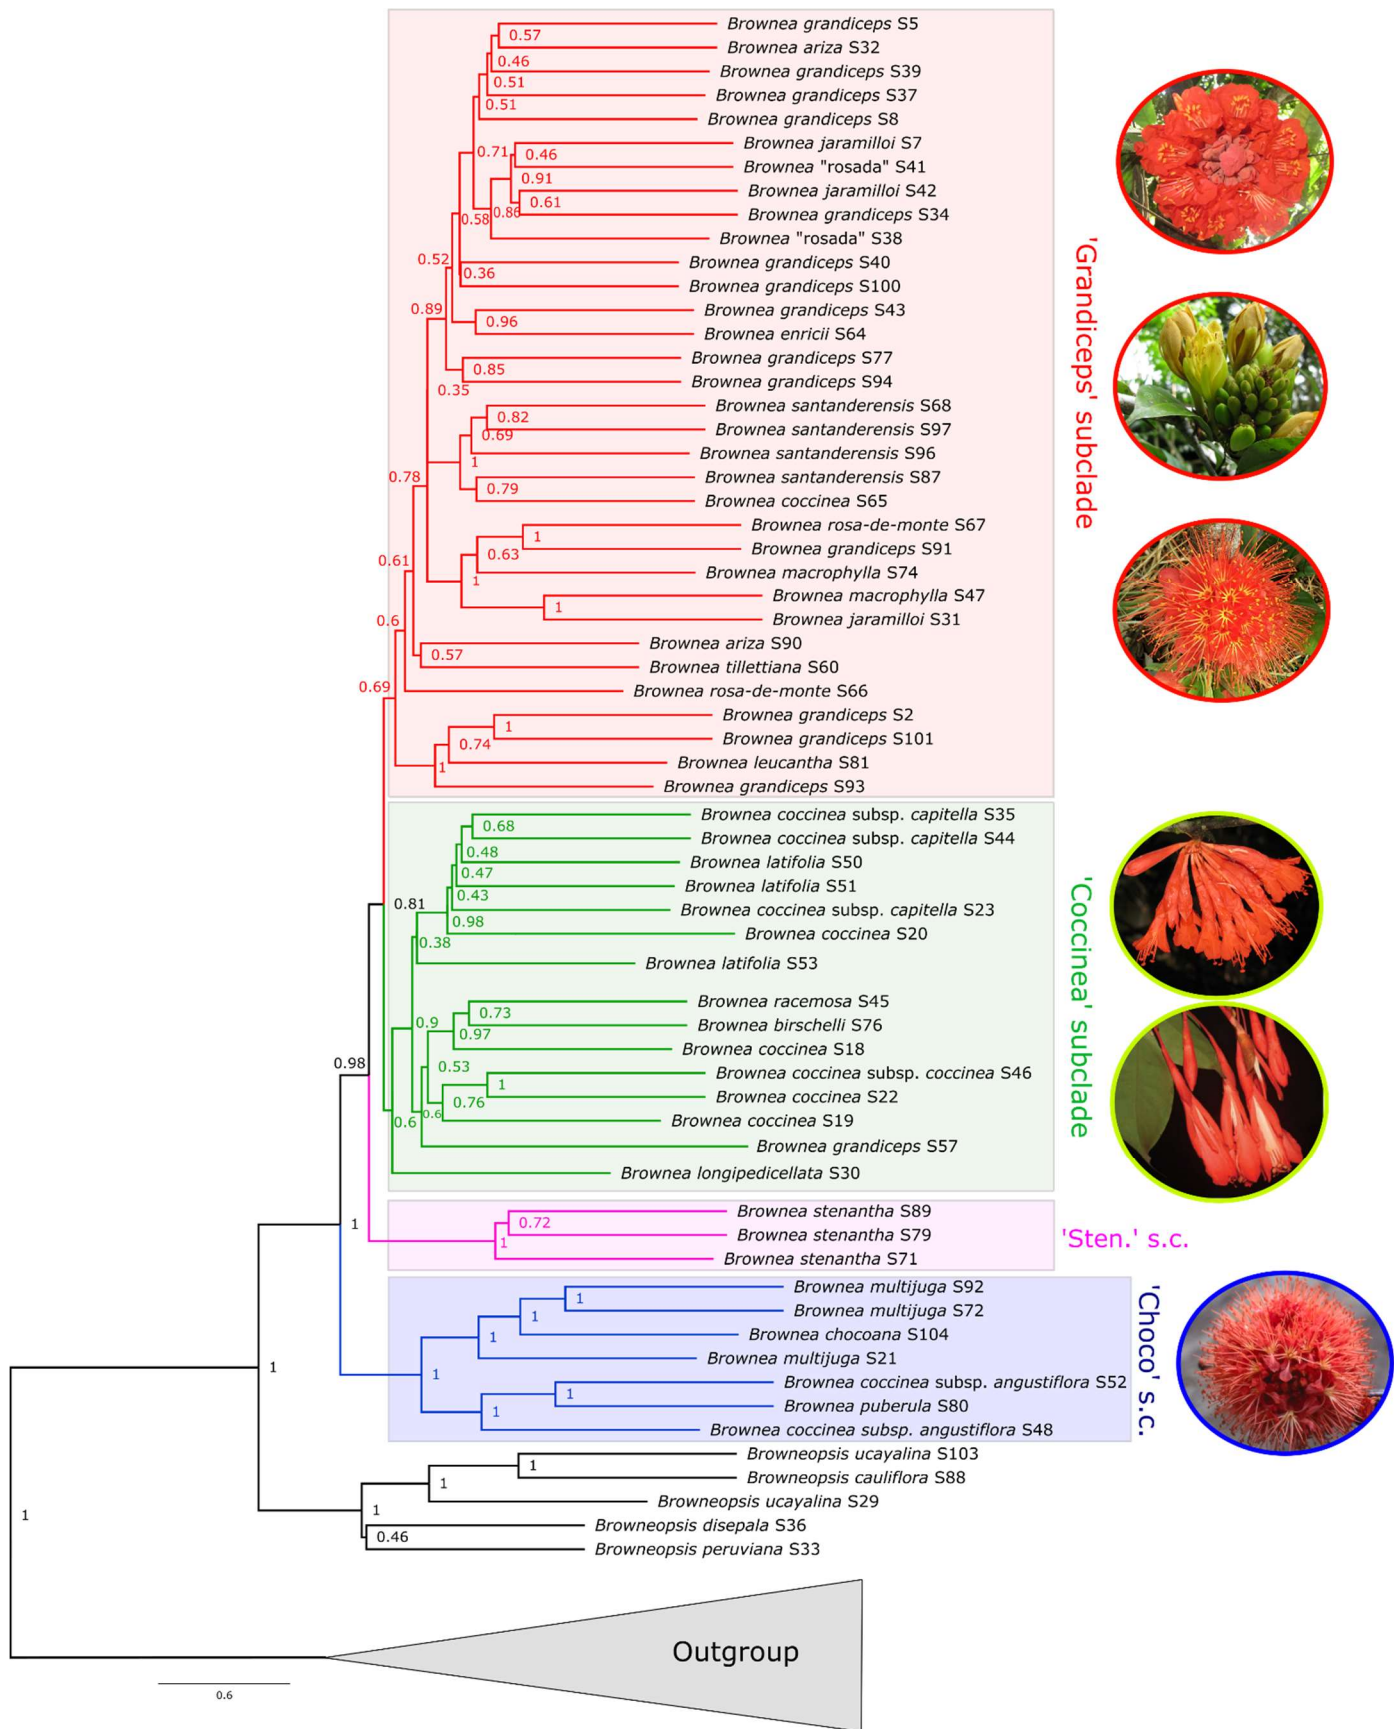

118

119



120

121 Ancient introgression in *Brownea* species

122 Phylogenetic networks were estimated using concordance factors (CF) generated from *RAxML* gene  
123 trees to ascertain whether the historical pattern of diversification in *Brownea* was tree-like or  
124 reticulate. Networks with different numbers of hybridization events ( $h$ ) were compared using -log  
125 pseudolikelihoods. The best-fitting network model was  $h = 2$ , as indicated by the -log  
126 pseudolikelihood values displayed in Supplementary Fig. 2, suggesting that there were two  
127 hybridization events within the *Brownea* taxa sampled for this study. Negative log pseudolikelihoods  
128 increased steadily between  $h = 0$  and  $h = 2$ , after which the increasing number of hybridization events  
129 only make minimal improvements to -log pseudolikelihood.

130

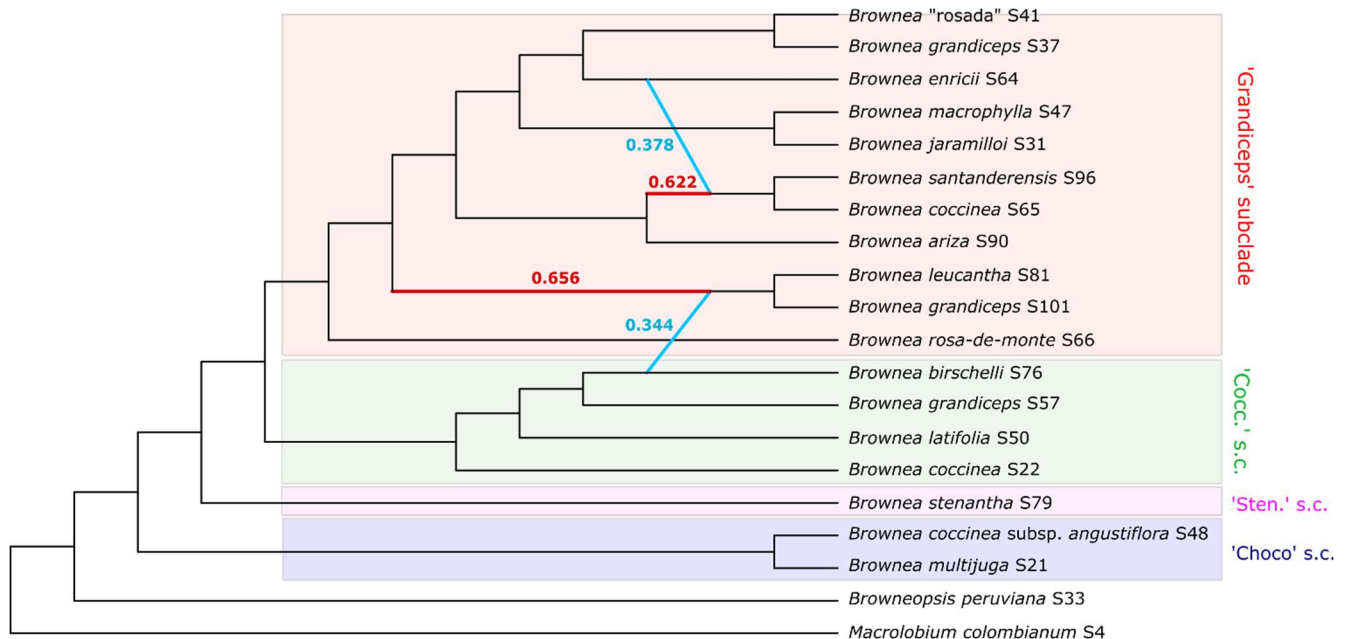

131

132

133 The inferred phylogenetic network (Fig. 3) showed a broadly similar topology to the species tree in  
134 Fig. 2, with the addition of two hybridization events. The first hybridization event occurred between  
135 the lineage leading to the Venezuelan accessions of *B. grandiceps*/*B. leucantha* and *B. birschelli*,

136 suggesting that the lineage leading to *B. birschelli* has in the past contributed around 34% of the  
137 genetic material present in the common ancestor of the Venezuelan *B. grandiceps* and *B. leucantha*.  
138 The second inferred occurrence of hybrid ancestry occurs between the ancestors of the subclade  
139 containing the Colombian accessions of *B. coccinea*/*B. santanderensis* and the lineage leading to *B.*  
140 *enricii*, which contributed around 37% of the genetic material belonging to the ancestor of the  
141 aforementioned subclade.

142 TICR (Tree Incongruence Checking in R) analysis indicated that a network-like model best described  
143 the patterns of incongruence in the single-accession-per-species gene trees inferred during this study.  
144 This method suggested an excess of outlier quartets ( $P = 1.240 \times 10^{-19}$ ,  $X^2 = 91.149$ ), which differed  
145 significantly from the CF values expected under a model containing only incomplete lineage sorting.  
146 As such, a tree-like model was able to be rejected as an explanation for the observed relationships  
147 between taxa in *Brownea*, suggesting that hybridization occurred over the course of its evolutionary  
148 history.

149

#### 150 Introgression dynamics across loci

151 Having examined the degree of historical reticulation among *Brownea* lineages, population genomic  
152 data were generated with ddRAD sequencing and used to investigate recent introgression at a finer  
153 taxonomic scale. More specifically, the degree of shared genetic variation was visualised for co-  
154 occurring individuals of *B. grandiceps* and *B. jaramilloi*, which putatively hybridize in the wild.  
155 Following this, in order to make inferences about the potential evolutionary significance of recent  
156 introgression, the rates at which different loci introgress relative to the rest of the genome were  
157 estimated for these taxa using genomic clines.

158 In total, ddRAD sequencing resulted in 640,898,950 reads between 350-550bp in length for 171  
159 individuals. Among these reads, 28,503,796 (4.45%) were discarded due to poor recovery. There was  
160 a mean of 3,747,947 reads per individual, with an average coverage depth across all samples of 27.5x.



161 Relatively high levels of shared genetic variation were observed among taxa, along with low levels of  
162 genetic differentiation and only marginal differences in the amount of genetic variation, as shown by  
163 the population genetic statistics calculated by the Stacks pipeline for the two *Brownea* species  
164 (including *B. “rosada”*, which is grouped with *B. grandiceps*) (Supplementary Table 3). The  $F_{st}$   
165 calculated between *B. grandiceps*/*B. “rosada”* and *B. jaramilloi* was 0.111, representing a low degree  
166 of fixation, and so a high amount of shared variation.

167 Patterns of shared genetic variation were visualised using principal component analysis (PCA) and a  
168 genetic distance network inferred with the program *SPLITSTREE*<sup>38</sup>. These analyses indicated a  
169 distinct signature of admixture between *B. grandiceps* and *B. jaramilloi*. The PCA of SNP variation  
170 inferred using the R package *ggplot2* (Fig. 4) indicated that the first principal component (PC1)  
171 explained the largest proportion of the genetic variation among all the principal components (20.4%).  
172 Individuals of *B. grandiceps* are tightly clustered along PC1, where the individuals of *B. jaramilloi*  
173 show much more variability, with many individuals forming an intergradation between the two main  
174 species clusters. Additionally, the *B. “rosada”* accessions appear to have clustered more closely to *B.*  
175 *grandiceps* than to *B. jaramilloi* along PC1. PC2, which explained 10.7% of the variation in the SNP  
176 data, shows a similar degree of variability in both *B. grandiceps* and *B. jaramilloi*, with two  
177 accessions of *B. “rosada”* shown to cluster in between both species. This pattern is reflected by the  
178 implicit network built using *SPLITSTREE* (Supplementary Fig. 3). *SPLITSTREE* recovered a  
179 clustering of individuals into two main groups, largely representing *B. grandiceps* and *B. jaramilloi*,  
180 with four putative hybrid individuals displaying an intermediate relationship between the two species  
181 clusters.

182

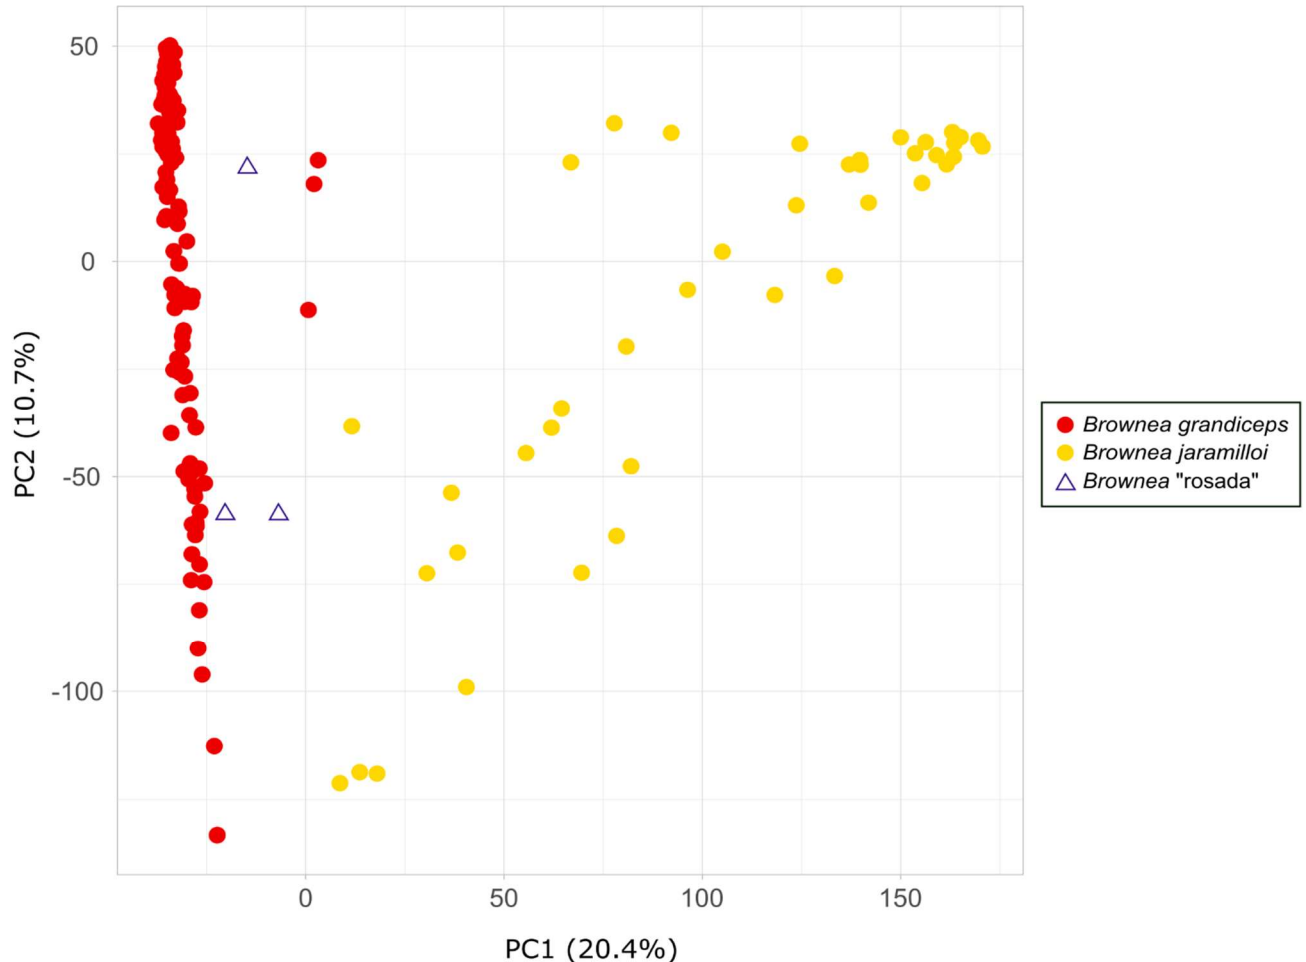

183

184

185 A *fastSTRUCTURE* analysis<sup>39</sup> was performed to further examine the degree of shared genetic  
186 variation, as well as providing information on the population genetic structure of the two species. This  
187 analysis indicated that there was a large amount of shared ancestry between the genotyped individuals  
188 (Fig. 5), with evidence of extensive backcrossing due to the widely differing proportions of ancestry  
189 in different individuals. Marginal likelihood comparison indicated that the best value of  $K$  (i.e., the  
190 number of populations) was two, which was the value that resulted in the largest increase in marginal  
191 likelihood ( $\Delta_{\text{marginal likelihood}} = 0.085$ , Supplementary Fig. 4A)). Since the ‘best’ value of  $K$  is an  
192 estimate, *fastSTRUCTURE* plots generated with other  $K$  values are shown in Supplementary Fig. 4B.  
193 In Fig. 5, it appears that most individuals identified as *B. jaramilloi* have, at least in part, some *B.*  
194 *grandiceps* ancestry. In addition, the individuals identified as *B. "rosada"* appear to have inherited  
195 most of their ancestry from *B. grandiceps*, with only a minimal contribution from *B. jaramilloi*. The

196 same pattern was recovered from a *fastSTRUCTURE* run incorporating 40 random individuals from  
197 each species, performed to account for any bias which may have been incurred by differences in  
198 sample size (Supplementary Fig. 4C).

199

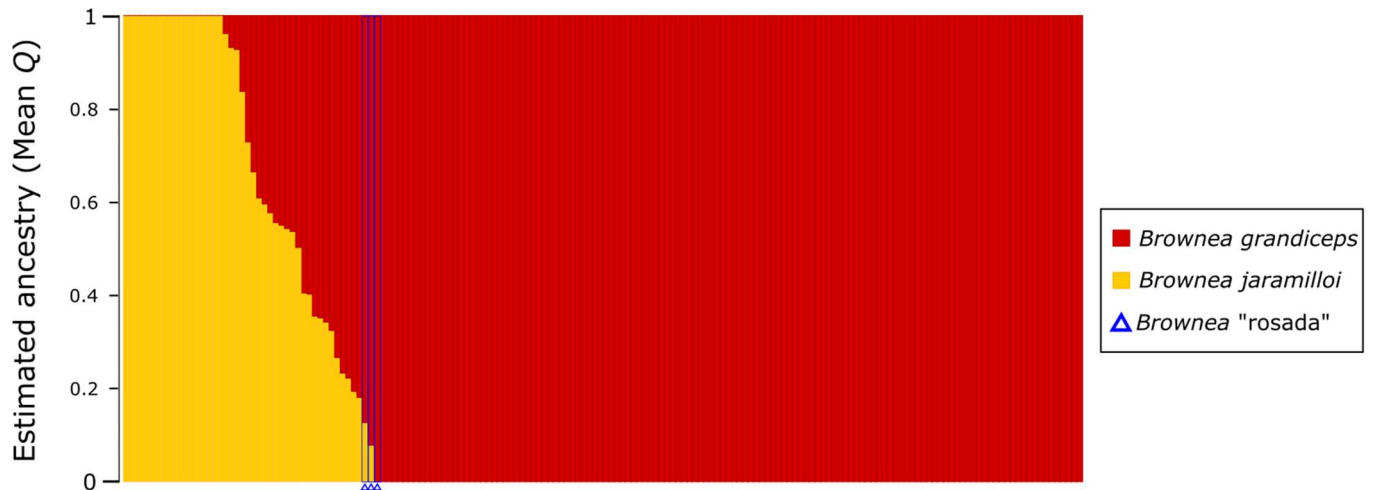

200

201

202 A *NEWHYBRIDS* analysis <sup>40</sup> (<https://github.com/eriqande/newhybrids>) was used to categorize 169 of  
203 171 genotyped individuals into different hybrid classes (pure, F1, F2, and backcrosses). This was  
204 performed on three subsets of 500 loci due to the computational limitations of the program.

205 *NEWHYBRIDS* revealed that most hybrid individuals were the result of continued hybridization, with  
206 pure *B. grandiceps* making up 73.9% of the genotyped population, and pure *B. jaramilloi* making up  
207 21.9%. There were no F1 (first generation) hybrids identified by the subset of loci analysed, and all  
208 hybrid individuals were either F2 hybrids (0.592%) or had a broad distribution of probabilities across  
209 hybrid classes (3.55%). In the latter, the probability of any one hybrid class did not exceed 90%,  
210 which was the threshold used to categorize individuals as belonging to a certain class.

211 Bayesian estimation of genomic clines (*bgc*) was utilised to determine whether any loci showed  
212 outlying rates of admixture relative to the genome-wide average among all genotyped individuals.  
213 This method estimates two parameters for each locus:  $\alpha$  (the 'direction' of introgression) and  $\beta$  (the  
214 'rate' of introgression), which were used to infer the impact of selection on introgressing loci. *bgc*

215 recovered a signal of asymmetric introgression but did not detect any differential rates of  
216 introgression between loci. Of the 19,130 loci under study, *bgc* recovered 251 loci (1.3%) with mostly  
217 *B. jaramilloi* alleles among all individuals (i.e. with positive  $\alpha$  estimates) and 1089 loci (5.69%) with  
218 mostly *B. grandiceps* alleles among all individuals (i.e., with negative  $\alpha$  estimates). However, no loci  
219 displayed extreme rates of introgression relative to the average rate across the genome (i.e., there were  
220 no statistically outlying  $\beta$  parameter estimates). The MCMC runs from which these results were  
221 drawn showed adequate mixing (Supplementary Fig. 5A-C).

222

## 223 Discussion

224 Our study represents the clearest documented case of reticulated evolution among Amazonian trees,  
225 which was previously seen as an extremely rare phenomenon. We demonstrate that within *Brownea*, a  
226 characteristic Amazonian tree genus, reticulated evolution has occurred over the course of its  
227 evolutionary history, with evidence of introgression deep in the history of the genus and more  
228 recently, between the closely related *B. grandiceps* and *B. jaramilloi*.

229 Phylogenetic network analysis suggested that introgression has taken place between *Brownea* lineages  
230 in the past, with two separate hybridization events inferred and displayed in Fig. 3. The concordance  
231 factors obtained from gene trees were not adequately explained by a tree-like model (i.e., one  
232 accounting only for incomplete sorting of ancestral variation), suggesting that a network-like model  
233 (i.e., one including introgression) best describes the diversification patterns within *Brownea* ( $P=$   
234  $1.240 \times 10^{-19}$ ,  $X^2 = 91.149$ ). Hybridization mainly occurs between individuals which are  
235 geographically overlapping, or have been so at some point in the past<sup>41</sup>. Our findings are thus further  
236 corroborated by the fact that both historical introgression events were between taxa that co-occur  
237 (e.g., *B. grandiceps*, *B. leucantha* and *B. birschelli* on the Northern coast of Venezuela, and *B.*  
238 *coccinea*, *B. santanderensis* and *B. enricii* within the Colombian cordilleras). This is also in  
239 agreement with previous work<sup>30</sup>, which indicated that the ‘stem’ lineages within *Brownea* shared a  
240 broad distribution across northern South America, which may have further facilitated earlier

241 hybridization. Our study also recovered a low degree of support for inter-specific relationships (Fig.  
242 2) and a high degree of incongruence among gene trees (Supplementary Fig. 1). These results can be  
243 partially explained by introgression, rather than being caused purely by the stochasticity of lineage  
244 sorting in large populations, which is suggested to be a common phenomenon in many rainforest trees  
245 with large population sizes<sup>42</sup>. It seems that amongst closely-related species of *Brownea* it is likely that  
246 divergence has not progressed to the point of complete reproductive isolation, as has been shown in  
247 temperate *Quercus* species<sup>43</sup>. Moreover, the low quartet scores and minimal gene-tree concordance  
248 found at the species level in this study mirror those observed in *Lachemilla*, a montane neotropical  
249 plant genus, in which gene tree discordance was shown to be explained by both historical and recent  
250 hybridization<sup>44</sup>.

251 Since the inferred events of ancient introgression both involved the common ancestors of two sets of  
252 present-day species, they are likely to have occurred several million years in the past, before the  
253 divergence of the descendent species. The inferred introgression events are likely to have occurred  
254 since the Miocene period (~23Ma), as date estimates from previous work suggest that *Brownea*  
255 originated around this time<sup>30</sup>. Accordingly, it is unlikely that the inferred hybridization events are due  
256 to ‘accidental’ hybridization between co-occurring species, merely producing maladapted F1 hybrids  
257 which will eventually be outcompeted, fortifying the boundaries between species (a process known as  
258 ‘reinforcement’<sup>15</sup>). Rather, our results suggest a persistence of introgression over evolutionary time  
259 within *Brownea*.

260 This investigation also uncovered a substantial signal of recent introgression between *B. grandiceps*  
261 and *B. jaramilloi* in the Yasuní National Park 50ha plot located in the Ecuadorian Amazon, with  
262 evidence of multi-generational ‘backcrossing’, further suggesting that hybridization does not always  
263 result in reinforcement. All hybrid individuals exhibited some degree of backcrossing in the  
264 *NEWHYBRIDS* analysis, which implies that hybrids persist over time. The low  $F_{st}$  estimate for the *B.*  
265 *grandiceps*/*B.* “rosada” and *B. jaramilloi* populations (0.11), in addition to the principal component  
266 analysis (Fig. 4), the *fastSTRUCTURE* analysis (Fig. 5) and the *SPLITSTREE* plot (Supplementary  
267 Fig. 3) indicated a high degree of shared variation between these lineages. All these approaches show

268 that individuals cluster into two main groups, largely representing *B. grandiceps* and *B. jaramilloi*, as  
269 well as a set of individuals forming an intergradation between the two main clusters. The individuals  
270 which form a part of this intergradation were mostly identified as *B. jaramilloi*, although hybrid  
271 individuals are also observed in the *B. grandiceps* cluster. The higher number of variant sites and the  
272 higher nucleotide diversity ( $\pi$ ) recovered for *B. jaramilloi* (Supplementary Table 3) could also reflect  
273 the hybrid ancestry of many individuals identified as this species. A similar introgression-driven  
274 increase in nucleotide diversity has been shown in closely-related species of *Mimulus* which undergo  
275 asymmetric introgression<sup>45</sup>.

276 The *bgc* analysis indicated that most introgression was asymmetric, with more loci containing mostly  
277 *B. grandiceps* alleles (5.96% of all loci) than loci containing mostly *B. jaramilloi* alleles (1.3% of all  
278 loci). Importantly, this *bgc* analysis also indicated that gene flow occurs largely at the same rate  
279 across loci, since there were no outlying estimates of the  $\beta$  parameter. The excess of *B. grandiceps*  
280 ancestry mirrors the asymmetry of introgression suggested by Fig. 5 and is likely driven by the  
281 uneven population sizes of the two species. *Brownea jaramilloi* has only ever been observed in a  
282 small part of the western Amazon<sup>33</sup> and is much less populous than *B. grandiceps*, which occurs  
283 across northern South America. More specifically, the disproportionate donation of alleles from *B.*  
284 *grandiceps* may be due to ‘pollen swamping’, whereby pollen transfer from another, more populous  
285 species is more likely than pollen transfer from less numerous conspecifics<sup>46</sup>. Pollen swamping can  
286 serve as a mechanism of invasion (e.g., in *Quercus*<sup>47</sup>), and the associated asymmetric introgression  
287 may lead to the extinction of the rarer species, especially when hybrids are inviable or sterile<sup>48</sup>.  
288 However, due to the ongoing introgression evident between *B. grandiceps* and *B. jaramilloi* it appears  
289 that hybrids are not always sterile, or at least that ‘foreign’ alleles are not always subject to strong  
290 purifying selection. The best evidence of this is the absence of loci with extreme values of the  $\beta$   
291 parameter recovered by our *bgc* analysis. Extreme deviations in  $\beta$  are mainly expected in the presence  
292 of gene flow when selection against hybrids is strong, resulting in underdominance and a paucity of  
293 heterozygous sites<sup>25</sup>.



294 Further to this, the observed asymmetry in introgression could be caused by selection favouring  
295 hybrid genotypes. The transfer of genomic regions which confer a selective advantage from a donor to  
296 a recipient species (i.e. adaptive introgression) can result in a disproportionate amount of one species'  
297 genome being present in hybrid individuals<sup>49</sup>. This occurs when viable hybrids only tend to backcross  
298 with one of the parental species, thereby introducing the other species' genetic material into the first  
299 in an asymmetrical fashion. Selection has been suggested as a driver for asymmetric introgression in  
300 multiple plant genera, including *Helianthus*<sup>50</sup> and *Iris*<sup>51</sup>. Accordingly, it is possible that selectively  
301 advantageous alleles are passing between species (e.g., between *B. jaramilloi* and *B. grandiceps*)  
302 through backcrossing events over many generations as observed by the *fastSTRUCTURE* and  
303 *NEWHYBRIDS* analyses in this study<sup>52</sup>. This may facilitate adaptation to new niches due to the  
304 widening of the pool of variation upon which selection can act<sup>18</sup>. However, it is difficult to ascertain  
305 whether adaptive introgression has occurred without measuring the impact of introgression on  
306 variation in the phenotype and its fitness effects<sup>19</sup>.

307 Studies such as ours that document hybridization between tree species within Amazonia, and within  
308 tropical rainforests in general, are rare. Indeed, it was previously suggested that interspecific hybrids  
309 between rainforest tree species are poor competitors, and that fertile hybrid populations are nearly  
310 non-existent<sup>8</sup>. While there is some evidence of introgression in tropical trees<sup>11</sup>, most available studies  
311 substantiating this are based on trees from other tropical regions or habitats (e.g., *Shorea* in Asia<sup>53,54</sup>,  
312 or *Rhizophora* in Indo-Pacific mangroves<sup>55</sup>). Many of these other instances appear to occur only in  
313 degraded habitats, or involve infertile first-generation hybrids with minimal backcrossing, which  
314 contrasts with the findings of our study. Within *Brownea* we found evidence of introgression across  
315 taxonomic, spatial and temporal scales, with evidence of backcrossing and a lack of selection against  
316 hybrid genotypes. It is possible that a lack of selection against hybrids allows the passage of variation  
317 between *Brownea* species, which may persist over evolutionary time and could help explain why we  
318 found evidence of introgression both at macroevolutionary and microevolutionary scales. While it is  
319 difficult to determine whether hybridization between Amazonian tree lineages is a more common  
320 occurrence than previously thought, or whether it is a tendency unique to certain rainforest genera

321 such as *Brownea*, it may be prudent to review how relationships among tropical tree lineages are  
322 inferred. Accordingly, in order to understand the evolutionary relationships within such groups using  
323 phylogenetic networks may provide additional insight into whether reticulate evolution has  
324 contributed to diversification within Amazonian rainforest, which is among the most species-rich  
325 environments on Earth <sup>41, 56</sup>.

326

## 327 Methods

### 328 Phylogenetic analysis

329 Sequences from 226 nuclear genes were used to elucidate the evolutionary relationships between  
330 *Brownea* species using a phylogenomic approach. DNA sequence data were generated from leaf  
331 material collected from herbarium specimens and silica-gel dried accessions using targeted bait  
332 capture. Targeted bait capture uses RNA probes to enable the sequencing of fragmented DNA, such as  
333 that collected from historical natural history collections. Details of library preparation, hybridization  
334 and sequencing are detailed in Supplementary Methods 1. Twenty-three of twenty-seven lineages  
335 were sampled within the genus *Brownea*, including the three subspecies of *B. coccinea* and one  
336 putative hybrid lineage (*Brownea* “rosada”, a putative hybrid of *B. grandiceps* and *B. jaramilloi*). In  
337 total, 59 accessions were sampled within *Brownea*, as well as an additional 13 outgroup taxa from the  
338 genera *Macrolobium*, *Heterostemon*, *Paloue* and *Browneopsis*, which form part of the ‘*Brownea*  
339 clade’ (Leguminosae, subfamily Detarioideae <sup>57</sup>). The list of accessions and their associated  
340 information can be found in Supplementary Table 1.

341 DNA sequencing reads were quality-checked with the program *FASTQC* v0.11.3 <sup>58</sup>, and were  
342 subsequently trimmed using *Trimmomatic* v.0.3.6 <sup>59</sup>. This was done to remove adapter sequences and  
343 to quality-filter reads, by removing reads that were too short or of poor quality, as assessed by their  
344 phred-33 score. Following quality-filtering, loci were assembled using *SPAdes* v3.11.1 <sup>16</sup> by the  
345 HybPiper pipeline v1.2 <sup>60</sup>, and potentially paralogous loci were removed using the Python <sup>61</sup> script  
346 ‘*paralog\_investigator.py*’, distributed with the HybPiper pipeline. All sequences were aligned by gene

347 region using *MAFFT* v7.215<sup>62</sup>. In order to infer gene trees for phylogenetic network analysis, the 226  
348 gene regions were further refined to include only 20 taxa, representing a single accession per lineage  
349 in *Brownea*, using *Macrolobium colombianum* as the outgroup taxon. Where applicable, samples were  
350 chosen by comparing the sequence recovery of conspecific accessions and choosing the individual  
351 with the best gene recovery. This resulted in 220 single-accession-per-lineage gene alignments.  
352 Further details of quality filtering, read assembly and alignment of DNA sequencing reads are given  
353 in Supplementary Methods 1.

354 Gene trees were generated for each of the 226 gene alignments using *RAxML* v.8.0.26<sup>37</sup> with 1,000  
355 rapid bootstrap replicates and the GTRCAT model of nucleotide substitution, which is a parameter-  
356 rich model and hence is most suitable for large datasets. *Macrolobium colombianum* was used to root  
357 both the full and single-accession dataset analyses since it was the *Macrolobium* accession that was  
358 present in the most gene alignments. The gene trees from both datasets were used to generate species  
359 trees under the multi-species coalescent model in *ASTRAL* v.5.6.1<sup>36</sup>. The heuristic version of *ASTRAL*  
360 was used because gene trees were estimated for >30 taxa, and the default parameters for the program  
361 were used for species tree inference. Monophyly was not enforced for individuals belonging to the  
362 same species (the '-a' option in *ASTRAL*). Finally, discordance between gene trees was calculated and  
363 visualised for the full dataset using the Java program *PhyParts* v0.0.1<sup>63</sup>  
364 (<https://bitbucket.org/blackrim/phyparts>). The pattern of incongruence between gene trees for each  
365 node was then mapped onto the *ASTRAL* species tree using the Python script *PhyPartsPieCharts* v1.0  
366 (<https://github.com/mossmatters/MJPythonNotebooks>).

367

### 368 *Inferring ancient introgression*

369 Phylogenetic networks were inferred for 220 gene trees from the single-accession-per-lineage dataset  
370 to understand whether introgression occurred over the course of the evolutionary history of *Brownea*.  
371 Networks were inferred with the program *SNaQ!*, implemented in the *Julia* v0.6.4<sup>64</sup> package  
372 *PhyloNetworks* v0.11.0<sup>56</sup>. Networks were estimated using gene trees from the single-accession-per-

373 lineage dataset as per the assumptions of the program, which requires that each tip of the phylogenetic  
374 trees represent a single lineage. This dataset contained 20 taxa from the genera *Brownea*, *Browneopsis*  
375 and *Macrolobium*. The network with the number of hybridization events ( $h$ ) best describing the data  
376 was chosen using negative log pseudolikelihood comparison. Finally, the topologies of the gene trees  
377 were compared with those of the best-fit phylogenetic network and those expected under a coalescent  
378 model (i.e., a ‘tree-like’ model which accounts for incomplete lineage sorting but not hybridization).  
379 The fit of the observed gene tree topologies to either the ‘network-like’ or the ‘tree-like’ model was  
380 assessed using the Tree Incongruence Checking in R (TICR) test <sup>65</sup>, implemented in the R v3.4.4 <sup>66</sup>  
381 package *PHYLOLM* <sup>67</sup>. Proportions of genes contributed between lineages by hybridization events  
382 were taken from the ‘Gamma value’ output of *PhyloNetworks*. Further details of phylogenetic  
383 network analysis are contained in Supplementary Methods 1.

384

### 385 Population-level introgression

386 The architecture and rates of introgression across the genome were examined using two ecologically  
387 divergent *Brownea* species which co-occur in the Ecuadorian Amazon. In order to do this we used  
388 ddRADseq <sup>68</sup>, a reduced-representation genotyping approach which uses restriction enzymes to  
389 fragment genomic DNA to generate many thousands of sequence markers *de-novo* for SNP discovery.  
390 One-hundred and seventy-one specimens in total were genotyped using dried leaf material. Sampling  
391 consisted of 128 individuals of *Brownea grandiceps*, 40 individuals of *B. jaramilloi* and three  
392 individuals of *B. “rosada”* (the putative hybrid of *B. grandiceps* and *B. jaramilloi*), representing the  
393 relative abundance of each species in the forest plot from which they were sampled. Leaf material was  
394 collected from *Brownea* trees in the Yasuni National Park 50ha forest plot in Napo, Ecuador, and  
395 dried in a herbarium press. The sample list is shown in Supplementary Table 2. Sampling, library  
396 preparation and sequencing protocols are explained further in Supplementary Methods 2.

397 DNA sequencing reads from the ddRADseq genotyping were processed *de novo* (i.e., without the use  
398 of a reference genome) using the Stacks pipeline v2.1 <sup>69</sup>. Reads were quality filtered using Stacks by

399 removing reads which were of poor quality (i.e., had a phred score <10), following which ‘stacks’ of  
400 reads were created, and SNPs were identified among all *de novo* ‘loci’ and across individuals. This  
401 was done using a minimum coverage depth (the ‘-m’ flag in Stacks) of three and a within-individual  
402 mismatch distance (-M) of seven nucleotides. Individuals with sequencing coverage under 7.5x were  
403 removed. Loci found in fewer than 40% of individuals and sites with a minor allele frequency  
404 threshold of 5% were filtered out using the ‘populations’ module of Stacks.

405 This resulted in a dataset containing 22,046 loci with 120,085 SNPs for 171 individuals. A dataset  
406 containing only one SNP per locus was also extracted using the Stacks *populations* module for use in  
407 analyses which assumed no linkage disequilibrium. This subsetting resulted in a dataset containing  
408 19,130 loci with 19,130 SNPs for 171 individuals. Details of read assembly and filtering are shown in  
409 Supplementary Methods 2.

410 In order to understand the patterns of introgression at the population level, the full ddRAD dataset was  
411 used to visualise the degree of shared variation between *B. grandiceps* and *B. jaramilloi*. This was  
412 performed using principal component analysis implemented in R v3.4.4, followed by plotting with  
413 *ggplot2*<sup>70</sup>, and by producing a neighbour net plot in *SPLITSTREE* v4.14.6<sup>38</sup>. Furthermore, the single-  
414 SNP-per-locus dataset containing 19,130 RAD loci was used to infer population structure with the  
415 program *fastSTRUCTURE* v1.0<sup>39</sup>. The number of populations (*K*) was chosen using the value which  
416 provided the largest improvement in marginal likelihood. Finally, *NEWHYBRIDS* v1.1<sup>40</sup>

417 (<https://github.com/eriqande/newhybrids>) was used to categorise individuals into different hybrid  
418 classes, using three runs of 500 randomly subsetting ddRAD loci. Runs were performed with 50,000  
419 MCMC sweeps following 50,000 burn-in sweeps under the default parameters of the program.

420 The relative ‘rate’ and ‘direction’ of introgression for each locus between the two *Brownea* species  
421 was estimated using Bayesian estimation of genomic clines (*bgc*) v1.03<sup>71</sup>. For each locus, *bgc*  
422 compares the probability of ancestry at the locus relative to an individual’s genome wide ancestry,  
423 thereby allowing it to estimate two parameters for each locus. These parameters are  $\alpha$ , which roughly  
424 equates to the ‘direction’ of introgression, and  $\beta$ , which may be summarised as the ‘rate’ of  
425 introgression for a locus<sup>25, 71</sup>. In order to estimate these parameters from the single-SNP dataset

426 consisting of 19,130 RAD loci, 50,000 MCMC generations with a 50% burn-in were used in *bgc*.  
427 Admixture proportions (i.e., mean  $Q$  values) generated by *fastSTRUCTURE* were used to assign each  
428 individual to three populations (*Brownea grandiceps*, *B. jaramilloi* and admixed). Convergence was  
429 checked for the MCMC output from *bgc* in Tracer v1.6<sup>72</sup> and with the R package *coda*<sup>73</sup> using  
430 Geweke's diagnostic<sup>74</sup>. Loci with significant 'excess ancestry' were identified by ascertaining  
431 whether the 99% posterior probability estimates of the  $\alpha$  and  $\beta$  parameters included zero (i.e., by  
432 identifying positive or negative non-zero estimates of the parameters). In addition, loci which were  
433 extreme 'introgression outliers' were identified for both parameters by identifying loci whose median  
434 estimates were not included in the 99% posterior probability credible intervals<sup>71</sup>. Further details of  
435 visualising shared variation, hybrid category assignment and *bgc* analysis are shown in  
436 Supplementary Methods 2.

437

#### 438 Data Availability

439 The datasets that support the findings of this study are available from online repositories. All raw  
440 reads generated with the targeted bait capture and ddRADseq methods are available on the NCBI  
441 Sequence Read Archive with the accession numbers SAMN13439069- SAMN13439140 and  
442 SAMN13441804- SAMN13441974, respectively, under the Bioproject number PRJNA592723. All  
443 full phylogenomic sequence alignments, single-accession-per-species alignments and tree files, *bgc*  
444 input files, Stacks output files and the Detarioideae bait kit sequence file are found on Dryad  
445 (<https://doi.org/10.5061/dryad.k3j9kd53w>). The full phylogenomic sequence alignments underlie the  
446 phylogeny in Fig. 2, while the single-accession-per-species alignments and tree files underlie Fig. 3.  
447 The variant call format (VCF) and Structure files provided on Dryad underlie Fig. 4 and Fig. 5. Data  
448 are under embargo until publication, and any further data required are available from the  
449 corresponding author upon request. A reporting summary for this article is available as a  
450 Supplementary Information file.

451



452

453

## References

- 454 1. Mayr, E. in *Systematics and the Origin of Species* (Columbia University Press, New York, New  
455 York, USA., 1942).
- 456 2. Barraclough, T. G. in *The Evolutionary Biology of Species* (Oxford University Press, Oxford,  
457 2019).
- 458 3. Kearns, A. M. *et al.* Genomic evidence of speciation reversal in ravens. *Nat. Comm.* **9**, 906 (2018).
- 459 4. Vonlanthen, P. *et al.* Eutrophication causes speciation reversal in whitefish adaptive radiations.  
460 *Nature* **482**, 357-362 (2012).
- 461 5. Mallet, J. Hybrid speciation. *Nature* **446**, 279-283 (2007).
- 462 6. Antonelli, A. & Sanmartín, I. Why are there so many plant species in the Neotropics? *Taxon* **60**,  
463 403-414 (2011).
- 464 7. Ehrendorfer, F. Evolutionary patterns and strategies in seed plants. *Taxon* **19**, 185-195 (1970).
- 465 8. Ashton, P. S. Speciation among tropical forest trees: some deductions in the light of recent  
466 evidence. *Biol. J. Linn. Soc.* **1**, 155-196 (1969).
- 467 9. Gentry, A. H. Neotropical floristic diversity: phytogeographical connections between Central and  
468 South America, Pleistocene climatic fluctuations, or an accident of the Andean orogeny? *Ann. Mo.*  
469 *Bot. Gard.* **69**, 557-593 (1982).
- 470 10. Koptur, S. Outcrossing and pollinator limitation of fruit set: breeding systems of neotropical Inga  
471 trees (Fabaceae: Mimosoideae). *Evolution* **38**, 1130-1143 (1984).
- 472 11. Scotti-Saintagne, C. *et al.* Phylogeography of a species complex of lowland Neotropical rain  
473 forest trees (Carapa, Meliaceae). *J. Biogeogr.* **40**, 676-692 (2013).
- 474 12. Cardoso, D. *et al.* Amazon plant diversity revealed by a taxonomically verified species list. *Proc.*  
475 *Natl. Acad. Sci. U. S. A.* **114**, 10695-10700 (2017).
- 476 13. Dexter, K. G. *et al.* Dispersal assembly of rain forest tree communities across the Amazon basin.  
477 *Proc. Natl. Acad. Sci. U. S. A.* **114**, 2645-2650 (2017).
- 478 14. Valencia, R., Balslev, H. & Miño, G. P. Y. High tree alpha-diversity in Amazonian Ecuador.  
479 *Biodiversity & Conservation* **3**, 21-28 (1994).
- 480 15. Hopkins, R. Reinforcement in plants. *New Phytol.* **197**, 1095-1103 (2013).
- 481 16. Rieseberg, L. H. & Wendel, J. F. Introgression and its consequences in plants. *Hybrid Zones and*  
482 *the Evolutionary Process* **70**, 70-109 (1993).
- 483 17. Taylor, S. A. & Larson, E. L. Insights from genomes into the evolutionary importance and  
484 prevalence of hybridization in nature. *Nature Ecology & Evolution* **3**, 170-177 (2019).

- 485 18. Whitney, K. D., Randell, R. A. & Rieseberg, L. H. Adaptive introgression of abiotic tolerance  
486 traits in the sunflower *Helianthus annuus*. *New Phytol.* **187**, 230-239 (2010).
- 487 19. Suarez-Gonzalez, A., Lexer, C. & Cronk, Q. C. B. Adaptive introgression: a plant perspective.  
488 *Biol. Lett.* **14**, 10.1098/rsbl.2017.0688 (2018).
- 489 20. Marques, D. A., Meier, J. I. & Seehausen, O. A combinatorial view on speciation and adaptive  
490 radiation. *Trends in Ecology & Evolution* **34**, 531-544 (2019).
- 491 21. Lamichhaney, S. *et al.* Rapid hybrid speciation in Darwin's finches. *Science* **359**, 224-228 (2018).
- 492 22. Rieseberg, L. H. *et al.* Major ecological transitions in wild sunflowers facilitated by hybridization.  
493 *Science* **301**, 1211-1216 (2003).
- 494 23. Meier, J. I. *et al.* Ancient hybridization fuels rapid cichlid fish adaptive radiations. *Nature*  
495 *Communications* **8**, 14363 (2017).
- 496 24. Payseur, B. A. Using differential introgression in hybrid zones to identify genomic regions  
497 involved in speciation. *Molecular Ecology Resources* **10**, 806-820 (2010).
- 498 25. Gompert, Z., Parchman, T. L. & Buerkle, C. A. Genomics of isolation in hybrids. *Philos. Trans.*  
499 *R. Soc. Lond. B. Biol. Sci.* **367**, 439-450 (2012).
- 500 26. Hamilton, J. A. & Aitken, S. N. Genetic and morphological structure of a spruce hybrid (*Picea*  
501 *sitchensis* × *P. glauca*) zone along a climatic gradient. *Am. J. Bot.* **100**, 1651-1662 (2013).
- 502 27. Sullivan, A. R., Owusu, S. A., Weber, J. A., Hipp, A. L. & Gailing, O. Hybridization and  
503 divergence in multi-species oak (*Quercus*) communities. *Bot. J. Linn. Soc.* **181**, 99-114 (2016).
- 504 28. Abbott, R. J. *et al.* Hybridization and speciation. *J. Evol. Biol.* **26**, 229-246 (2013).
- 505 29. Seehausen, O. *et al.* Genomics and the origin of species. *Nature Reviews Genetics* **15**, 176-192  
506 (2014).
- 507 30. Schley, R. J. *et al.* Is Amazonia a 'museum' for Neotropical trees? The evolution of the Brownea  
508 clade (Detarioideae, Leguminosae). *Mol. Phylogenet. Evol.* **126**, 279-292 (2018).
- 509 31. Crawford, T. & Nelson, E. Irish Horticulturists. I: WH Crawford. *Garden History* **7**, 23-26 (1979).
- 510 32. Backer, C. A. in *Schoolflora voor Java* 418 (Visser & Co., Weltevreden, Java, Dutch East Indies,  
511 1911).
- 512 33. Pérez, Á J., Klitgård, B. B., Saslis-Lagoudakis, C. & Valencia, R. *Brownea jaramilloi*  
513 (Leguminosae: Caesalpinioideae), a new, over-looked species endemic to the Ecuadorian Amazon .  
514 *Kew Bull.* **68**, 157-162 (2013).
- 515 34. Klitgaard, B. B. Ecuadorian *Brownea* and *Browneopsis* (Leguminosae-Caesalpinioideae):  
516 taxonomy, palynology, and morphology. *Nord. J. Bot.* **11**, 433-449 (1991).
- 517 35. ter Steege, H. *et al.* Hyperdominance in the Amazonian tree flora. *Science* **342**, 1243092 (2013).
- 518 36. Zhang, C., Rabiee, M., Sayyari, E. & Mirarab, S. ASTRAL-III: polynomial time species tree  
519 reconstruction from partially resolved gene trees. *BMC Bioinformatics* **19**, 153 (2018).

- 520 37. Stamatakis, A. RAxML version 8: a tool for phylogenetic analysis and post-analysis of large  
521 phylogenies. *Bioinformatics* **30**, 1312-1313 (2014).
- 522 38. Huson, D. H. & Bryant, D. Application of phylogenetic networks in evolutionary studies. *Mol.*  
523 *Biol. Evol.* **23**, 254-267 (2005).
- 524 39. Raj, A., Stephens, M. & Pritchard, J. K. fastSTRUCTURE: variational inference of population  
525 structure in large SNP data sets. *Genetics* **197**, 573-589 (2014).
- 526 40. Anderson, E. C. & Thompson, E. A. A model-based method for identifying species hybrids using  
527 multilocus genetic data. *Genetics* **160**, 1217-1229 (2002).
- 528 41. Burbrink, F. T. & Gehara, M. The biogeography of deep time phylogenetic reticulation. *Syst. Biol.*  
529 **67**, 743-744 (2018).
- 530 42. Pennington, R. T. & Lavin, M. The contrasting nature of woody plant species in different  
531 neotropical forest biomes reflects differences in ecological stability. *New Phytol.* **210**, 25-37 (2016).
- 532 43. Lepais, O. & Gerber, S. Reproductive patterns shape introgression dynamics and species  
533 succession within the European white oak species complex. *Evolution* **65**, 156-170 (2011).
- 534 44. Morales-Briones, D. F., Liston, A. & Tank, D. C. Phylogenomic analyses reveal a deep history of  
535 hybridization and polyploidy in the Neotropical genus *Lachemilla* (Rosaceae). *New Phytol.* **218**,  
536 1668-1684 (2018).
- 537 45. Sweigart, A. L. & Willis, J. H. Patterns of nucleotide diversity in two species of *Mimulus* are  
538 affected by mating system and asymmetric introgression. *Evolution* **57**, 2490-2506 (2003).
- 539 46. Buggs, R. J. & Pannell, J. R. Rapid displacement of a monoecious plant lineage is due to pollen  
540 swamping by a dioecious relative. *Current Biology* **16**, 996-1000 (2006).
- 541 47. Petit, R. J., Bodénès, C., Ducouso, A., Roussel, G. & Kremer, A. Hybridization as a mechanism  
542 of invasion in oaks. *New Phytol.* **161**, 151-164 (2004).
- 543 48. Balao, F., Casimiro-Soriguer, R., García-Castaño, J. L., Terrab, A. & Talavera, S. Big thistle eats  
544 the little thistle: does unidirectional introgressive hybridization endanger the conservation of  
545 *Onopordum hinojense*? *New Phytol.* **206**, 448-458 (2015).
- 546 49. Yang, W. *et al.* Genomic evidence for asymmetric introgression by sexual selection in the  
547 common wall lizard. *Mol. Ecol.* **27**, 4213-4224 (2018).
- 548 50. Scascitelli, M. *et al.* Genome scan of hybridizing sunflowers from Texas (*Helianthus annuus* and  
549 *H. debilis*) reveals asymmetric patterns of introgression and small islands of genomic differentiation.  
550 *Mol. Ecol.* **19**, 521-541 (2010).
- 551 51. Arnold, M. L., Tang, S., Knapp, S. J. & Martin, N. H. Asymmetric introgressive hybridization  
552 among Louisiana Iris species. *Genes* **1**, 9-22 (2010).
- 553 52. Mallet, J. Hybridization as an invasion of the genome. *Trends in Ecology & Evolution* **20**, 229-237  
554 (2005).

- 555 53. Kenzo, T. *et al.* Overlapping flowering periods among *Shorea* species and high growth  
556 performance of hybrid seedlings promote hybridization and introgression in a tropical rainforest of  
557 Singapore. *For. Ecol. Manage.* **435**, 38-44 (2019).
- 558 54. Kamiya, K. *et al.* Morphological and molecular evidence of natural hybridization in *Shorea*  
559 (Dipterocarpaceae). *Tree Genetics & Genomes* **7**, 297-306 (2011).
- 560 55. Lo, E. Testing hybridization hypotheses and evaluating the evolutionary potential of hybrids in  
561 mangrove plant species. *J. Evol. Biol.* **23**, 2249-2261 (2010).
- 562 56. Solís-Lemus, C., Bastide, P. & Ané, C. PhyloNetworks: a package for phylogenetic networks.  
563 *Mol. Biol. Evol.* **34**, 3292-3298 (2017).
- 564 57. Legume Phylogeny Working Group. A new subfamily classification of the Leguminosae based on  
565 a taxonomically comprehensive phylogeny: The Legume Phylogeny Working Group (LPWG). *Taxon*  
566 **66**, 44-77 (2017).
- 567 58. Andrews, S. FastQC: a quality control tool for high throughput sequence data. Available online  
568 at <http://www.bioinformatics.babraham.ac.uk/projects/fastqc>. (2010).
- 569 59. Bolger, A. M., Lohse, M. & Usadel, B. Trimmomatic: a flexible trimmer for Illumina sequence  
570 data. *Bioinformatics* **30**, 2114-2120 (2014).
- 571 60. Johnson, M. G. *et al.* HybPiper: Extracting coding sequence and introns for phylogenetics from  
572 high-throughput sequencing reads using target enrichment. *App. Plant. Sci.* **4**, 1600016 (2016).
- 573 61. Python Software Foundation. Python Language Reference, version 2.7. <http://www.python.org>  
574 (2010).
- 575 62. Katoh, K. & Standley, D. M. MAFFT multiple sequence alignment software version 7:  
576 improvements in performance and usability. *Mol. Biol. Evol.* **30**, 772-780 (2013).
- 577 63. Smith, S. A., Moore, M. J., Brown, J. W. & Yang, Y. Analysis of phylogenomic datasets reveals  
578 conflict, concordance, and gene duplications with examples from animals and plants. *BMC*  
579 *Evolutionary Biology* **15**, Published online: DOI 10.1186/s12862-015-0423-0 (2015).
- 580 64. Bezanson, J., Edelman, A., Karpinski, S. & Shah, V. B. Julia: A fresh approach to numerical  
581 computing. *SIAM Rev* **59**, 65-98 (2017).
- 582 65. Stenz, N. W., Larget, B., Baum, D. A. & Ané, C. Exploring tree-like and non-tree-like patterns  
583 using genome sequences: an example using the inbreeding plant species *Arabidopsis thaliana* (L.)  
584 Heynh. *Syst. Biol.* **64**, 809-823 (2015).
- 585 66. R Development Core Team. R: A language and environment for statistical computing. Available  
586 at: <http://www.R-project.org/>. (2013).
- 587 67. Ho, L. S. T. & Ané, C. A linear-time algorithm for Gaussian and non-Gaussian trait evolution  
588 models. *Syst. Biol.* **63**, 397-408 (2014).
- 589 68. Peterson, B. K., Weber, J. N., Kay, E. H., Fisher, H. S. & Hoekstra, H. E. Double digest RADseq:  
590 an inexpensive method for de novo SNP discovery and genotyping in model and non-model species.  
591 *PloS one* **7**, e37135 (2012).

- 592 69. Catchen, J. M., Amores, A., Hohenlohe, P., Cresko, W. & Postlethwait, J. H. Stacks: building and  
593 genotyping Loci de novo from short-read sequences. *G3 (Bethesda)* **1**, 171-182 (2011).
- 594 70. Wickham, H. in *ggplot2: elegant graphics for data analysis* (Springer, 2016).
- 595 71. Gompert, Z. & Buerkle, C. A. Bayesian estimation of genomic clines. *Mol. Ecol.* **20**, 2111-2127  
596 (2011).
- 597 72. Rambaut, A., Suchard, M. A., Xie, D. & Drummond, A. J. Tracer.  
598 <http://tree.bio.ed.ac.uk/software/tracer/> **1.6** (2015).
- 599 73. Plummer, M., Best, N., Cowles, K. & Vines, K. CODA: convergence diagnosis and output  
600 analysis for MCMC. *R news* **6**, 7-11 (2006).
- 601 74. Geweke, J. in *Evaluating the accuracy of sampling-based approaches to the calculation of*  
602 *posterior moments* (Federal Reserve Bank of Minneapolis, Research Department, Minneapolis, MN,  
603 USA, 1991).

604

#### 605 Acknowledgements

606 Laboratory work, fieldwork and herbarium visits to NY and US were funded by the NERC SSCP  
607 DTP, and a Genetics society Heredity Fieldwork grant funded part of the fieldwork in Ecuador.  
608 Phylogenomic sequencing was also part-funded by a grant from the Royal Botanic Gardens, Kew.  
609 Thank you to Dario Ojeda for baits and associated help, to Laszlo Csiba, Penny Malakasi, Niroshini  
610 Epitawalage, Dion Devey, Robyn Cowan and Steven Dodsworth for help in the laboratory, and to  
611 Gregor Gilfillan at the Norwegian sequencing centre for help with ddRAD sequencing. Thank you to  
612 Andres Melo Burbano for his help during fieldwork, as well as to Renato Valencia and Álvaro Pérez  
613 for helping to coordinate fieldwork in Ecuador. Thanks to Colin Hughes, Jeff Doyle and Matteo  
614 Fumagalli for comments on analytical methods, and to Peter Raven and Benjamin Torke for their  
615 comments on the rarity of hybridization in tropical trees.

616

617 Collection, transport and extraction of genetic material from plant accessions collected in Yasuní  
618 National Park were authorised by Ecuador's Environment Ministry. Permits were issued with the  
619 following authorization numbers:

- 620 • **Collection permit:** 021-2016-IC-FAU-FLO-DPAO-PNY;
- 621 • **Mobilization permit:** 037-2016-MOV-FLO-MAE-DPAO;

- 622       • **Export permit:** 208-2019-EXP-CM-FAU-DNB/MA; and  
623       • **Genetic research permit (Contrato Marco):** MAE-DNB-CM-2018-0082

624

625    Author Contributions

626    R.J.S. conceived this study and performed all analyses, supervised by T.B., F.F. and B.K. Population  
627    genomic data were generated by R.J.S., and phylogenomic data were generated by R.J.S., I.K. and I.L.  
628    Baits for hybrid capture were provided by M.d.l.E. R.J.S. wrote the first draft of the manuscript with  
629    contributions from R.T.P., O.A.P.E., A.J.H., M.d.l.E., I.L., T.B., F.F. and B.K.

630

631    Competing Interests

632    The authors declare no competing financial interest.

633

634    Figure Legends

635    **Figure 1:** Two co-occurring *Brownea* lineages (*Brownea grandiceps* (photograph © Rowan Schley)  
636    and *Brownea jaramilloi* (photograph © Xavier Cornejo)) as well as their putative hybrid *Brownea*  
637    “rosada” (photograph © J. L. Clark).

638

639    **Figure 2:** *ASTRAL* species tree inferred from *RAxML* gene trees using the multi-species coalescent  
640    model. Numbers at nodes of the tree signify local posterior probability (LPP) values, a measure of  
641    support for each quadripartition. Taxa within the red box belong to the ‘Grandiceps’ subclade, taxa  
642    within the green box belong to the ‘Coccinea’ subclade, taxa within the pink box represent the  
643    ‘Stenantha’ subclade and those within the blue box belong to the ‘Chocóan’ subclade. Images show  
644    inflorescences of species within *Brownea*- species shown are, from top to bottom: *B. grandiceps*  
645    (photograph © Rowan Schley), *B. jaramilloi* (photograph © Xavier Cornejo), *B. macrophylla*



646 (photograph © Bente Klitgaard), *B. coccinea* subsp. *capitella* (photograph © Xavier Cornejo), *B.*  
647 *longipedicellata* (photograph © Domingos Cardoso) and *B. multijuga* (photograph © Bente  
648 Klitgaard).

649

650 **Figure 3:** Phylogenetic network with one hybridization event ( $h = 2$ ), estimated using *SNaQ!* in the  
651 Julia package *PhyloNetworks*. Light blue horizontal branches indicate inferred hybridization events,  
652 and numbers next to the branches show the estimated proportion of genes contributed by each lineage  
653 in the hybridization event. Red branches signify the ancestral lineage and what proportion of the  
654 modern lineage's genes were contributed from it. Taxa were chosen in order to represent one  
655 accession per lineage, as per the assumptions of *PhyloNetworks*, and the individual with the highest  
656 gene recovery was used for each lineage. Coloured boxes containing taxa are described in the legend  
657 of Fig. 2.

658

659 **Figure 4:** Principal component analysis of genotype data for all SNPs inferred at all loci. Individuals  
660 are coded by colour and point shape: red circles denote individuals identified as *B. grandiceps*, yellow  
661 circles denote individuals identified as *B. jaramilloi*, and blue triangles denote putative hybrid  
662 individuals (*B.* “rosada”). The amount of the genetic variation explained by each principle component  
663 is shown next to axes, which are labelled PC1 and PC2.

664

665 **Figure 5:** *fastSTRUCTURE* plot, indicating ancestry proportions for two populations ( $K = 2$ ). The  
666 ‘populations’ correspond to two different species: *B. grandiceps* (shown in red) and *B. jaramilloi*  
667 (shown in yellow). Each individual accession is represented by a column, and the proportion of  
668 ancestry from either species (mean  $Q$ ) is proportional to the length of different coloured bars in each  
669 column. Individuals identified as *B.* “rosada” are marked with a blue box and a blue triangle beneath  
670 their column. All taxa to the left and right of these boxes were identified as *B. jaramilloi* and *B.*  
671 *grandiceps*, respectively.
